## Prognostic impact of SYNTAX II score in patients with cardiogenic shock complicating ST-elevation myocardial infarction: analysis of an 10-year all-comers registry

M. Juskova, P. Tasende Rey, B. Cid Alvarez, B. Alvarez Alvarez, J.M. Garcia Acuna, P. Rigueiro Veloso, R. Agra Bermejo, J. Lopez Pais, J. Sanmartin Pena, D. Lopez Otero, M. Fernandez Alvarez, R. Trillo Nouche, J.R. Gonzalez Juanatey

Hospital Clínico Universitario, Santiago De Compostela, Spain

Funding Acknowledgement: Type of funding source: None

**Background:** The SYNTAX II score (SS-II) can predict 4-year outcomes in patients with complex coronary artery disease and ST-segment elevation myocardial infarction (STEMI). Nonetheless, the prognostic value of SS-II for a cardiogenic shock (CS) in the setting of STEMI has not been assessed.

**Purpose:** This study aimed to investigate the predictive impact of SS-II in patients with CS complicating STEMI undergoing primary percutaneous coronary intervention, and whether SS-II adds prognostic information to predict major adverse cardiac events (MACE) and all-cause death in this population.

**Methods:** This prospective cohort study included 1965 consecutive patients with STEMI who underwent primary-PCI between January 2008 and December 2017. The cohort of patients with CS (n=153) was identified and divided into three groups based on SS-II tertiles [SS-II low tertile <38 (n=51), ≥38 SS-II intermediate tertile <47 (n=51), and SS-II high tertile ≥48 (n=51)].

**Results:** Amongst the cohort of patients with CS mean age was 68.4±14.0 years, 69.2% were male and 51.6% presented with anterior STEMI (mean SSII was 45.1±14). In-hospital mortality was significantly higher in the high SS-II tertile (85.7% vs. 38.9% vs 24.4%,  $p \leq 0.001$ ) compared with SS-II intermediate and low tertiles. During follow-up (median 2.5 years), SS-II was positively correlated with MACE (89.3% (high SS-II) vs. 52.8% (int SS-II) vs. 42.2% (low SS-II),  $p \leq 0.001$ ), and with all-cause mortality (89.3% vs 44.4% vs 26.7%,  $p \leq 0.001$ ).

The SS-II was also an independent predictor of MACE (HR=1.042, 95% CI: 1.020–1.063,  $p=0.000$ ) and all-cause mortality during follow-up (HR=1.056, 95% CI: 1.033–1.079,  $p=0.000$ ).

**Conclusion:** In a real-world cohort of patients with STEMI related CS, the SS-II added important prognostic information, being an independent predictor of MACE and all-cause mortality during follow-up.

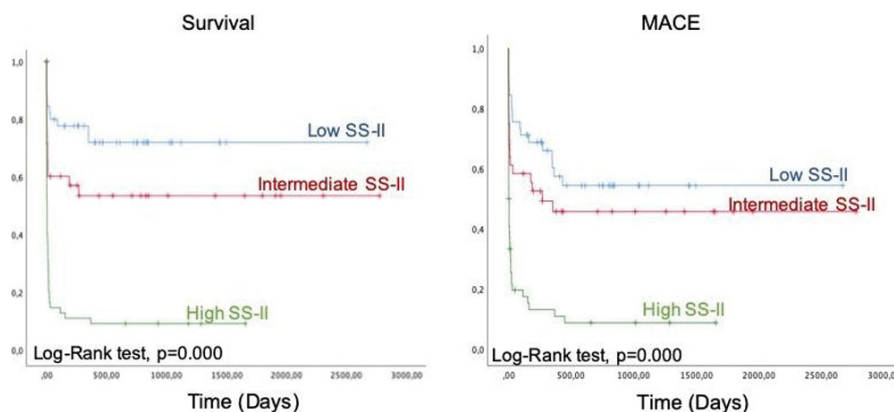

Image 1
